# Supplementary material for: Fast and single-step immunoassay based on fluorescence quenching within a square glass capillary immobilizing graphene oxide–antibody conjugate and fluorescently labelled antibody
Source: Royal Society of Chemistry journal article supplement (doi:10.1039/c5an02637g), 2016-01-01
Supplement: c5an02637g1.pdf [file c5an02637g1.pdf]

## Supporting Information

### Fast and single-step immunoassay based on the fluorescence quenching within a square glass capillary immobilizing graphene oxide-antibody conjugate and fluorescently labelled antibody

Akihiro Shirai,<sup>a</sup> Terence G. Henares,<sup>a</sup> Kenji Sueyoshi,<sup>a</sup> Tatsuro Endo<sup>a</sup> and Hideaki Hisamoto<sup>a</sup>

<sup>a</sup> Graduate School of Engineering, Osaka Prefecture University

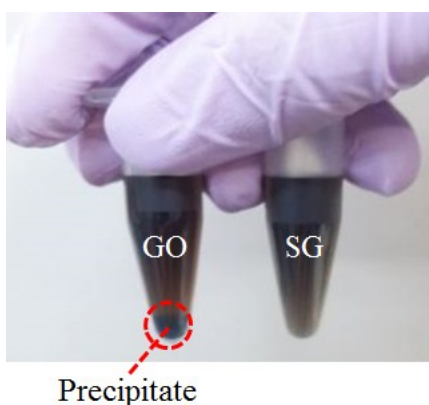

Fig. S1 Visual observation of the GO solution and SG solution after 30 minutes incubation in a 1.5-mL microtube.

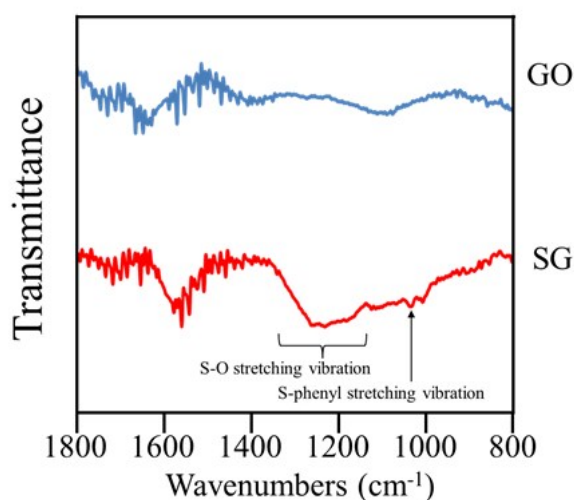

Fig. S2 FT-IR spectra of GO and SG. (FT-IR spectra were obtained by using JASCO FT/IR-4200.)
